# Supplementary material
Source: publisher site journal article supplement (https://www.dovepress.com/article/402855)
Supplement: Supplementary file 1 [file get_supplementary_file.php]

# Supplementary materials


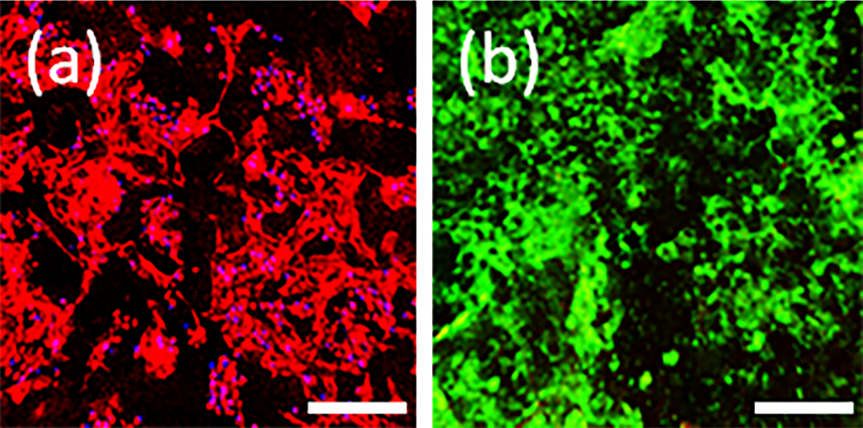


**Figure S1** Confocal microscope images of (a) F-actin stained hiPSC-CMs on a well-plate, and (b) live-dead assay stained hiPSC-CMs on a well-plate after 7 days. Scale bars, 100 µm.
